# Supplementary material for: A Study on the Feasibility of Robotic Harvesting for Chile Pepper
Source: MDPI journal article supplement (doi:10.3390/robotics10030094), 2021-07-22
Supplement: s1 [file s1]

# Supplementary Materials

Article

## A Study on the Feasibility of Robotic Harvesting for Chile Pepper

Muhammad Umar Masood and Mahdi Haghshenas-Jaryani \*

Department of Mechanical and Aerospace Engineering, New Mexico State University, Las Cruces, NM 88003, USA; umar@nmsu.edu

\* Correspondence: [mahdihj@nmsu.edu](mailto:mahdihj@nmsu.edu)

**Table S1: Harvesting Results**

The following table shows all the chile pepper which was in the reachable location for the robot arm. A total 22 chile pepper were not reachable, so the robot did not attempt to harvest those. But as per the metric of performance defined in the paper, those 22 were also considered in total data for the calculation of localization success rate and harvest success rate.

| Sr | Chile ID | Diameter (mm) | Location of chile pepper estimated by MATLAB |         |        | Value of pitch angle Arduino algorithm solved for (target is 0 for all) | Localized | Harvest | Damage |
|----|----------|---------------|----------------------------------------------|---------|--------|-------------------------------------------------------------------------|-----------|---------|--------|
|    |          |               | x                                            | y       | z      |                                                                         |           |         |        |
| 1  | 1        | 6.3           | 163.30                                       | -18.76  | 274.44 | 0                                                                       | 0         | 0       | 0      |
| 2  | 1        | 6.3           | 164.44                                       | -33.19  | 299.93 | 0                                                                       | 1         | 1       | 0      |
| 3  | 2        | 7.8           | 191.14                                       | 31.96   | 268.60 | 0                                                                       | 1         | 0       | 0      |
| 4  | 2        | 7.8           | 195.45                                       | 28.59   | 272.35 | 0                                                                       | 1         | 1       | 0      |
| 5  | 3        | 4.7           | 150.06                                       | 47.22   | 299.04 | 0                                                                       | 0         | 0       | 0      |
| 6  | 3        | 4.7           | 158.35                                       | 81.71   | 297.98 | 0                                                                       | 1         | 0       | 0      |
| 7  | 3        | 4.7           | 171.32                                       | 68.96   | 310.95 | 0                                                                       | 1         | 1       | 0      |
| 8  | 4        | 5.6           | 203.07                                       | 110.02  | 355.78 | 21                                                                      | 0         | 0       | 0      |
| 9  | 4        | 5.6           | 196.03                                       | 110.17  | 356.66 | 20                                                                      | 0         | 0       | 0      |
| 10 | 4R       | 5.6           | 154.34                                       | 95.72   | 354.71 | 15                                                                      | 0         | 0       | 0      |
| 11 | 4R       | 5.6           | 157.99                                       | 96.95   | 350.46 | 13                                                                      | 0         | 0       | 0      |
| 12 | 4R       | 5.6           | 158.62                                       | 76.01   | 346.24 | 11                                                                      | 0         | 0       | 1      |
| 13 | 5        | 4.7           | 161.37                                       | -169.39 | 317.91 | 5                                                                       | 0         | 0       | 0      |
| 14 | 6        | 4.7           | 128.55                                       | -116.08 | 276.00 | 0                                                                       | 1         | 1       | 0      |
| 15 | 7        | 4.8           | 96.97                                        | 80.97   | 305.23 | 0                                                                       | 1         | 1       | 0      |
| 16 | 8        | 5.2           | 127.63                                       | 9.59    | 313.95 | 0                                                                       | 1         | 1       | 0      |
| 17 | 9        | 5.1           | 140.06                                       | -94.42  | 376.90 | 24                                                                      | 0         | 0       | 0      |
| 18 | 9        | 5.1           | 152.77                                       | -107.67 | 383.68 | 28                                                                      | 0         | 0       | 0      |
| 19 | 9        | 5.1           | 164.15                                       | -123.42 | 379.29 | 28                                                                      | 0         | 0       | 0      |

|    |    |      |        |         |        |    |   |   |   |
|----|----|------|--------|---------|--------|----|---|---|---|
| 20 | 9R | 5.1  | 145.42 | -104.42 | 383.73 | 27 | 1 | 1 | 0 |
| 21 | 10 | 5.4  | 169.13 | -79.77  | 280.23 | 0  | 0 | 0 | 0 |
| 22 | 10 | 5.4  | 169.13 | -79.77  | 280.23 | 0  | 1 | 1 | 0 |
| 23 | 11 | 4.7  | 103.54 | -106.65 | 373.70 | 22 | 1 | 1 | 0 |
| 24 | 12 | 5.2  | 148.83 | -108.97 | 342.66 | 10 | 1 | 1 | 0 |
| 25 | 13 | 4.8  | 127.97 | 185.05  | 305.22 | 0  | 0 | 0 | 0 |
| 26 | 14 | 7.3  | 134.65 | 93.26   | 289.98 | 0  | 1 | 0 | 0 |
| 27 | 15 | 4.9  | 143.41 | -66.50  | 264.29 | 0  | 0 | 0 | 0 |
| 28 | 15 | 4.9  | 147.53 | -58.65  | 247.27 | 0  | 0 | 0 | 0 |
| 29 | 15 | 4.9  | 152.16 | -62.90  | 245.71 | 1  | 0 | 0 | 0 |
| 30 | 15 | 4.9  | 152.94 | -64.16  | 237.16 | 4  | 1 | 1 | 0 |
| 31 | 16 | 5.3  | 90.89  | -258.23 | 334.45 | 21 | 0 | 0 | 0 |
| 32 | 16 | 5.3  | 104.66 | 49.00   | 324.67 | 4  | 1 | 1 | 0 |
| 33 | 17 | 12.8 | 159.68 | 12.09   | 302.67 | 0  | 1 | 1 | 0 |
| 34 | 18 | 6.2  | 82.92  | -85.19  | 392.12 | 29 | 0 | 0 | 0 |
| 35 | 18 | 6.2  | 95.51  | -115.20 | 383.54 | 26 | 0 | 0 | 0 |
| 36 | 19 | 5.6  | 176.97 | -147.77 | 291.93 | 0  | 1 | 1 | 0 |
| 37 | 20 | 9    | 315.75 | -16.33  | 158.46 | 0  | 1 | 0 | 0 |
| 38 | 20 | 9    | 315.75 | -16.33  | 158.46 | 0  | 1 | 0 | 0 |
| 39 | 20 | 9    | 315.75 | -16.33  | 158.46 | 0  | 1 | 0 | 0 |
| 40 | 20 | 9    | 315.75 | -16.33  | 158.46 | 0  | 1 | 0 | 0 |
| 41 | 20 | 9    | 315.75 | -16.33  | 158.46 | 0  | 1 | 0 | 0 |
| 42 | 20 | 9    | 315.75 | -16.33  | 158.46 | 0  | 1 | 1 | 0 |
| 43 | 21 | 7    | 308.28 | 19.36   | 125.76 | 0  | 1 | 1 | 0 |
| 44 | 22 | 5.2  | 350.02 | 111.85  | 196.42 | 13 | 0 | 0 | 0 |
| 45 | 22 | 5.2  | 350.02 | 111.85  | 196.42 | 13 | 0 | 0 | 0 |
| 46 | 22 | 5.2  | 350.02 | 111.85  | 196.42 | 13 | 0 | 0 | 0 |
| 47 | 22 | 5.2  | 350.02 | 111.85  | 196.42 | 13 | 0 | 0 | 1 |
| 48 | 23 | 7    | 188.56 | -47.20  | 229.79 | 4  | 1 | 0 | 0 |
| 49 | 23 | 7    | 188.56 | -47.20  | 229.79 | 4  | 1 | 0 | 0 |
| 50 | 23 | 7    | 188.56 | -47.20  | 229.79 | 4  | 1 | 0 | 0 |
| 51 | 23 | 7    | 188.56 | -47.20  | 229.79 | 4  | 0 | 0 | 0 |
| 52 | 23 | 7    | 188.56 | -47.20  | 229.79 | 4  | 0 | 0 | 0 |
| 53 | 23 | 7    | 188.56 | -47.20  | 229.79 | 4  | 0 | 1 | 0 |
| 54 | 24 | 4.9  | 164.12 | -16.64  | 185.37 | 25 | 1 | 1 | 0 |
| 55 | 25 | 6.7  | 175.71 | 29.16   | 180.11 | 26 | 1 | 1 | 0 |

Summary of the results is as follows

|                    | Total<br>Chile<br>Pepper | Local-<br>ized | Har-<br>vested | Dam-<br>aged |
|--------------------|--------------------------|----------------|----------------|--------------|
| In reachable space | 55                       | 29             | 19             | 2            |

|                        |           |           |           |          |
|------------------------|-----------|-----------|-----------|----------|
| Not in reachable space | 22        | 0         | 0         | 0        |
| <b>Grand Total</b>     | <b>77</b> | <b>29</b> | <b>19</b> | <b>2</b> |

**Table S2: Chile Pepper 3D Location**

Following is the 3D location data

| Sr | X       | Y       | Z        |
|----|---------|---------|----------|
| 1  | -163.08 | -45.93  | 437.98   |
| 2  | -139.57 | -136.35 | 384.8    |
| 3  | -102.43 | -147.25 | 408.8    |
| 4  | -77.35  | -0.68   | 472.17   |
| 5  | -75.91  | 56.32   | 448.16   |
| 6  | -65.98  | 31.29   | 383.52   |
| 7  | -56.01  | -18.09  | 425.91   |
| 8  | -36.74  | 62.62   | 338.75   |
| 9  | -30.08  | -73.04  | 365.1    |
| 10 | -29.42  | 18.6    | 339.94   |
| 11 | -23.17  | -18.02  | 392.9    |
| 12 | -0.29   | -65.24  | 406.85   |
| 13 | 5.85    | -77.77  | 286.81   |
| 14 | 11.37   | -30.7   | 340.82   |
| 15 | 15.15   | 86.6    | 470.88   |
| 16 | 31.54   | -49.21  | 378.8    |
| 17 | 35.92   | -15.03  | 281.04   |
| 18 | 39.51   | -17.38  | 339.55   |
| 19 | 45.51   | 18.21   | 371.22   |
| 20 | 58.2    | 7.3     | 408.96   |
| 21 | 59.49   | -55.25  | 387.16   |
| 22 | 66.61   | -77.16  | 338.37   |
| 23 | 73.07   | -27.69  | 401.78   |
| 24 | 82.92   | -85.19  | 392.12   |
| 25 | 86.07   | 16.82   | 409.87   |
| 26 | 90.89   | -258.23 | 334.45   |
| 27 | 95.51   | -115.20 | 383.54   |
| 28 | -83.03  | 80.97   | 365.2286 |
| 29 | -76.58  | 14.09   | 467.19   |
| 30 | -76.46  | -106.65 | 493.70   |
| 31 | -75.34  | 49.00   | 444.67   |
| 32 | -74.99  | 18.06   | 572.66   |
| 33 | -52.37  | 9.59    | 373.9524 |
| 34 | -52.03  | 185.05  | 425.22   |
| 35 | -51.45  | -116.08 | 336.002  |
| 36 | -45.35  | 93.26   | 409.98   |

|    |        |         |          |
|----|--------|---------|----------|
| 37 | -39.94 | -94.42  | 436.9015 |
| 38 | -36.59 | -66.50  | 384.29   |
| 39 | -36.31 | 1.58    | 465.63   |
| 40 | -34.58 | -104.42 | 443.7324 |
| 41 | -32.47 | -58.65  | 367.27   |
| 42 | -29.94 | 47.22   | 359.0359 |
| 43 | -27.84 | -62.90  | 365.71   |
| 44 | -27.23 | -107.67 | 443.6764 |
| 45 | -25.66 | 95.72   | 414.7102 |
| 46 | -22.01 | 96.95   | 410.4555 |
| 47 | -21.65 | 81.71   | 357.9807 |
| 48 | -21.38 | 76.01   | 406.2439 |
| 49 | -20.32 | 12.09   | 422.67   |
| 50 | -18.63 | -169.39 | 377.9138 |
| 51 | -15.85 | -123.42 | 439.2926 |
| 52 | -15.56 | -33.19  | 359.9253 |
| 53 | -10.87 | -79.77  | 400.23   |
| 54 | -8.68  | 68.96   | 370.9483 |
| 55 | -3.03  | -147.77 | 411.93   |
| 56 | 11.14  | 31.96   | 328.6021 |
| 57 | 16.03  | 110.17  | 416.6578 |
